# Supplementary material
Source: PubMed Central journal article supplement (PMC6818088)
Supplement: NIHMS1016495-supplement-Cover.pdf [file NIHMS1016495-supplement-Cover.pdf]

# CHEM**MED**CHEM

CHEMISTRY ENABLING DRUG DISCOVERY

## Fluoro-Zoledronate Prodrug

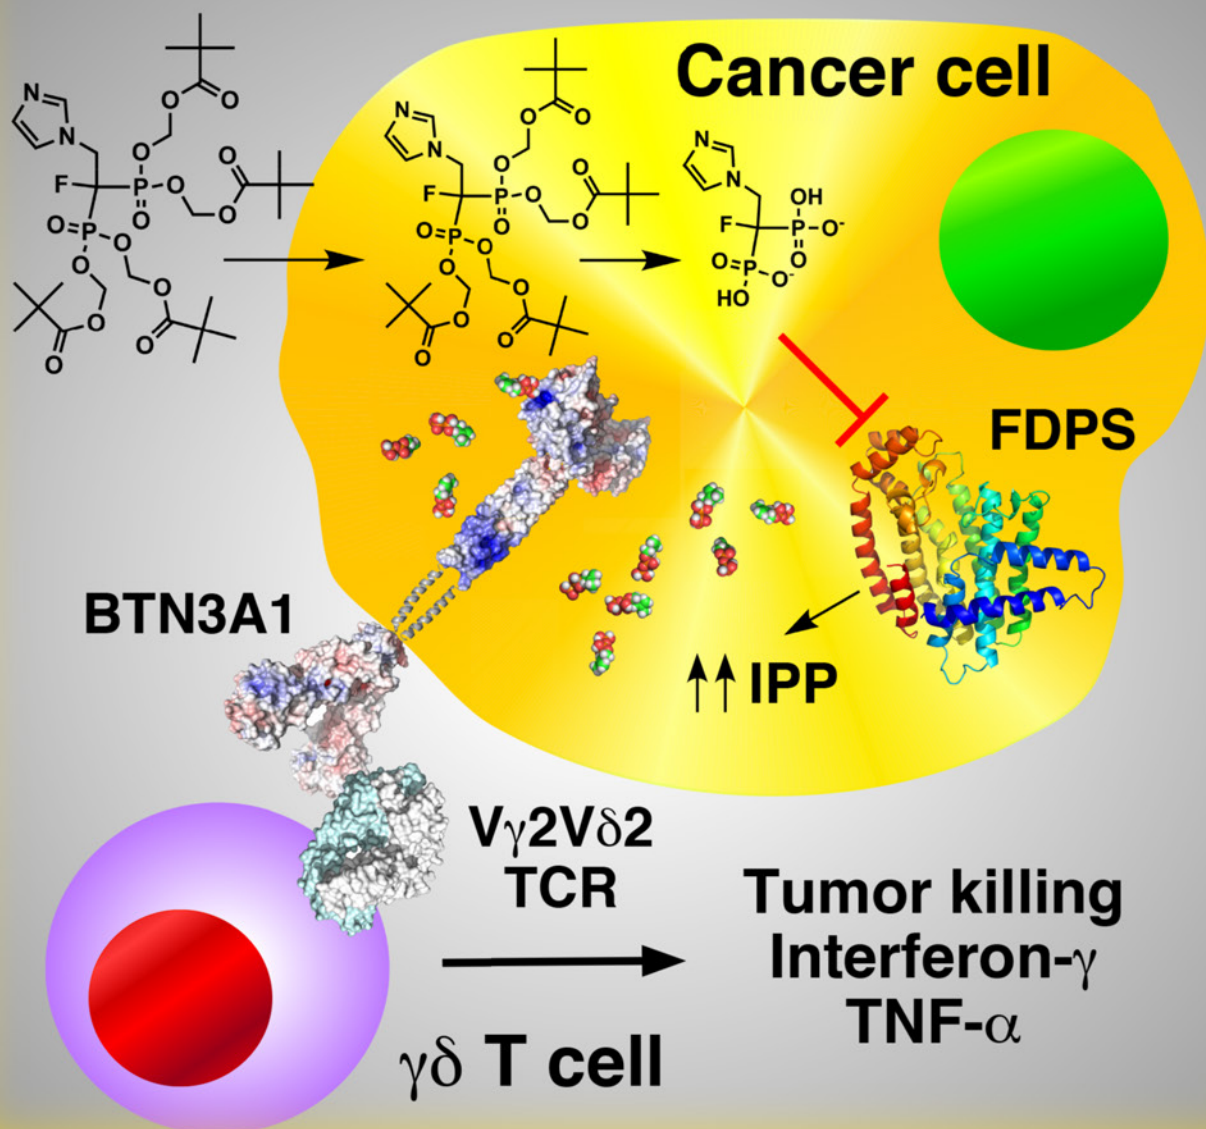

4/2019

Front Cover:

*Yoshimasa Tanaka et al.*

Synthesis and Immunomodulatory Activity  
of Fluorine-Containing Bisphosphonates

A Journal of

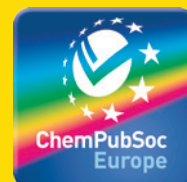

WILEY-VCH

[www.chemmedchem.org](http://www.chemmedchem.org)
